# Supplementary material
Source: PubMed Central journal article supplement (PMC10134835)
Supplement: jvi.00210-23-s0001.pdf [file jvi.00210-23-s0001.pdf]

1 **Supplemental Information**

2

3 **Porcine Enteric Alphacoronavirus entry through multiple pathways (caveolae, clathrin, and macropinocytosis) and requires Rab**

4 **GTPases for endosomal transport**

5 Xiong-nan Chen, Yi-fan Liang, Zhi-jun Weng, Wei-peng Quan, Chen Hu, Yun-zhao Peng,

6 Ying-shuo Sun, Qi Gao, Zhao Huang, Gui-hong Zhang, and Lang Gong

7

8 **Supplemental Information**

9

10

11 **Supplemental Experimental Procedures**

## 12 **MATERIALS AND METHODS**

13 **Cells and viruses.** Vero cells (ATCC CCL-81) were cultured in Dulbecco's modified  
14 Eagle's medium (DMEM; Invitrogen, NY, USA), supplemented with 10% fetal bovine  
15 serum (GIBCO, Invitrogen). Primary porcine enterocytes were extracted and isolated  
16 from the jejunum tissue of 0-day-old piglets. All cells were kept at 37°C in a humidified  
17 atmosphere of 5% CO<sub>2</sub>. PEAV strain GDS04, a gift from Professor Cao Yongchang of  
18 Sun Yat-sen University, was propagated in media containing 0.3% tryptophan phosphate  
19 (TPB) and 10 µg/ml trypsin (GBICO) in Vero cells, and P16 was used in the study. The  
20 prepared virus supernatant was centrifuged at 10,000 g for 15 min, and the supernatant  
21 was centrifuged at 100,000 g at 4°C for 1.5 h with Beckmann SW32Ti rotor, and the  
22 virus was suspended in HNE buffer solution (5 mM HEPES, 150 mM NaCl, and 0.1 mM  
23 EDTA [pH 7.4]). The virus suspension was added to a sucrose gradient (10% to 60%) and  
24 centrifuged in the same rotor at 120,000 g for 2 h at 4°C. The virus bands were collected  
25 from the 40-60% sucrose layer and centrifuged at 40,000 g for 1.5 h to remove sucrose.

26 Finally, the purified virus was resuspended in HNE buffer and stored at -80°C for future  
27 use.

28 **Viral infection.** Vero cells were grown to 100% confluence, washed with  
29 phosphate-buffered saline (PBS) to remove the serum, and inoculated with different MOI  
30 (multiplicity of infection) viruses containing 0.3% TPB (Tryptone Phosphate Broth) and  
31 10 µg/ml trypsin (virus maintenance medium). The virus supernatant (with cell fragments  
32 removed) was used in entry experiments in the study.

33 **Antibodies, inhibitors, and reagents.** Monoclonal antibody (1:500) was used for the  
34 indirect fluorescent antibody (IFA) test, and polyclonal antibody (1:1000) was used for  
35 Western blotting against PEAV N protein. Anti-Cytokeratin 18 (A19778) was purchased  
36 from Abclonal (1:200). Secondary antibodies (1:300) conjugated to Alexa Fluor 594 and  
37 647 were purchased from Proteintech. Methyl-β-cyclodextrin (MβCD, C4555),  
38 chlorpromazine hydrochloride (CPZ, C0982), 5-(N-ethyl-N-isopropyl)amiloride (EIPA,  
39 A3085), and proteinase K were purchased from Sigma-Aldrich. Alexa Fluor 488-labeled  
40 dextran (dextran, D22910) was purchased from Thermo Fisher Scientific.

41 **Quantitative real-time PCR (qRT-PCR).** Viral RNA was extracted using the Fastagen  
42 kit according to the manufacturer's instructions. RNA concentration was measured using  
43 a NanoDrop 2000 spectrophotometer. According to the manufacturer's instructions,  
44 cDNA was synthesized using 500 or 1,000 ng total RNA using iScript reverse  
45 transcriptase (Thermo Fisher Scientific). A 1:5 dilution of cDNA was used to perform  
46 quantitative real-time PCR (qRT-PCR) using a Light Cycler 480 real-time PCR system  
47 (Roche Diagnostics, Indianapolis, IN, USA). Data are presented as the  $2^{-\Delta\Delta CT}$  value from  
48 quadruplicate samples, and GAPDH was used as a reference gene.

49 **Immunofluorescence assay.** Vero cells or Primary porcine enterocytes were first grown  
50 on a 14 mm glass bottom cell culture dish (Cellvis) until 90% confluence, then inoculated  
51 with PEAV. The cells were fixed with 4% paraformaldehyde (PFA) at different times. The

52 samples were incubated at 20 ° C for 15 min, washed with PBS three times, and  
53 permeabilized with 0.3% Triton X-100 for 5 min. The cells were stained with specific  
54 antibodies (2 h, 4°C) overnight, or 37°C. All antibodies were diluted in 2% (w/v) BSA in  
55 PBS. Cells were washed thrice with PBS and incubated with the corresponding secondary  
56 antibody (1 h, 37°C). All secondary antibodies were diluted in PBS. Cell nuclei were  
57 stained with DAPI (4',6-diamidino-2-phenylindole, 1 µg/ml). Fluorescent images were  
58 acquired using the light-scanning module of a Leica TCS SP8 STED 3× confocal  
59 microscope.

60 **Cell viability assay.** Vero or IPI-2I cells were seeded into 96 well plates and grown to  
61 100% confluence. Different concentrations of drug inhibitors were added, and the cells  
62 were incubated at 37 ° C for 165 min. The medium of IPI-2I cells was changed to  
63 drug-free media and incubated for a further 6 h. Cell viability was determined by the  
64 CCK-8 kit according to the manufacturer's instructions. The absorbance values at 450 nm  
65 were measured to determine cell viability. An average of 4-8 readings were taken. Cell  
66 survival rate (%) = (OD of experimental group/OD of the control group) × 100%.  
67 Similarly, cells inoculated on a 96-well plate were transfected with corresponding  
68 siRNAs or siCtrl for 48 h, and a CCK-8 kit was used to determine cell viability. The  
69 effect of inhibitors or siRNA cell viability is shown in (Fig. S3).

70 **Entry assay.** Vero cells were seeded in a 6-well plate and pre-treated with a sub-toxic  
71 dose of drug inhibitor at 37°C for 15 min, then PEAV (MOI=0.1) was inoculated in the  
72 presence of drugs at 4°C for 1 h, and then PBS was used to wash the cells three times to  
73 remove the nonattached virus. Vero cells were cultured in virus maintenance medium  
74 containing drugs, 37°C, 1 h to allow virus internalization. Then, wash the cells with GN  
75 buffer (pH=3) for 5 min, remove the non-internalized virus particles on the cell surface,  
76 and wash the cells with precooled PBS three times. The cells were lysed according to the  
77 manufacturer's instructions, and RNA was extracted.

78 **Primary porcine enterocytes isolation.** Porcine enterocytes were extracted and isolated  
79 from the jejunum tissue of 0-day-old piglets. Briefly, tissue sections were cut into 5 cm  
80 pieces, washed with ice-cold PBS, and placed in 50 ml conical tubes containing 1X  
81 antibiotic-antimycotic. The intestinal segment was cut lengthwise, followed by vigorous  
82 shaking to remove intestinal contents or fully differentiated enterocytes, and washed with  
83 ice-cold PBS. The cleaned intestinal segments were placed in dishes with ice-cold PBS,  
84 and the intestinal villi were scraped off with a cell scraper and added to a 50 ml  
85 centrifuge tube with ice-cold PBS containing 2% fetal bovine serum. The tubes were  
86 centrifuged for 3 min at 500 g, washed with ice-cold PBS 5 times, and then cellular  
87 precipitates were collected. Freshly isolated jejunum epithelial cells were seeded at  
88 250,000 cells/well and maintained with Ham's F12 nutrient medium containing murine  
89 epidermal growth factor (Sigma) to stimulate epithelial cell growth and differentiation.  
90 Differentiated cells were grown on collagen hydrogels for virus infection experiments.

91 **Statistical analysis.** All data are presented as the mean  $\pm$  SD. A Student's t-test was used  
92 to compare the data from pairs of treated and untreated groups. Statistical significance is  
93 indicated by asterisks (\*,  $P < 0.05$ ; \*\*,  $P < 0.01$ ; \*\*\*,  $P < 0.001$ ) in the figures. All statistical  
94 analyses and calculations were performed using Prism 5 (GraphPad Software, Inc., La  
95 Jolla, CA).

96

97

98

99

100

101

102

103

104

105

106

107

108

109

110

111 **Supplemental Figures**

112

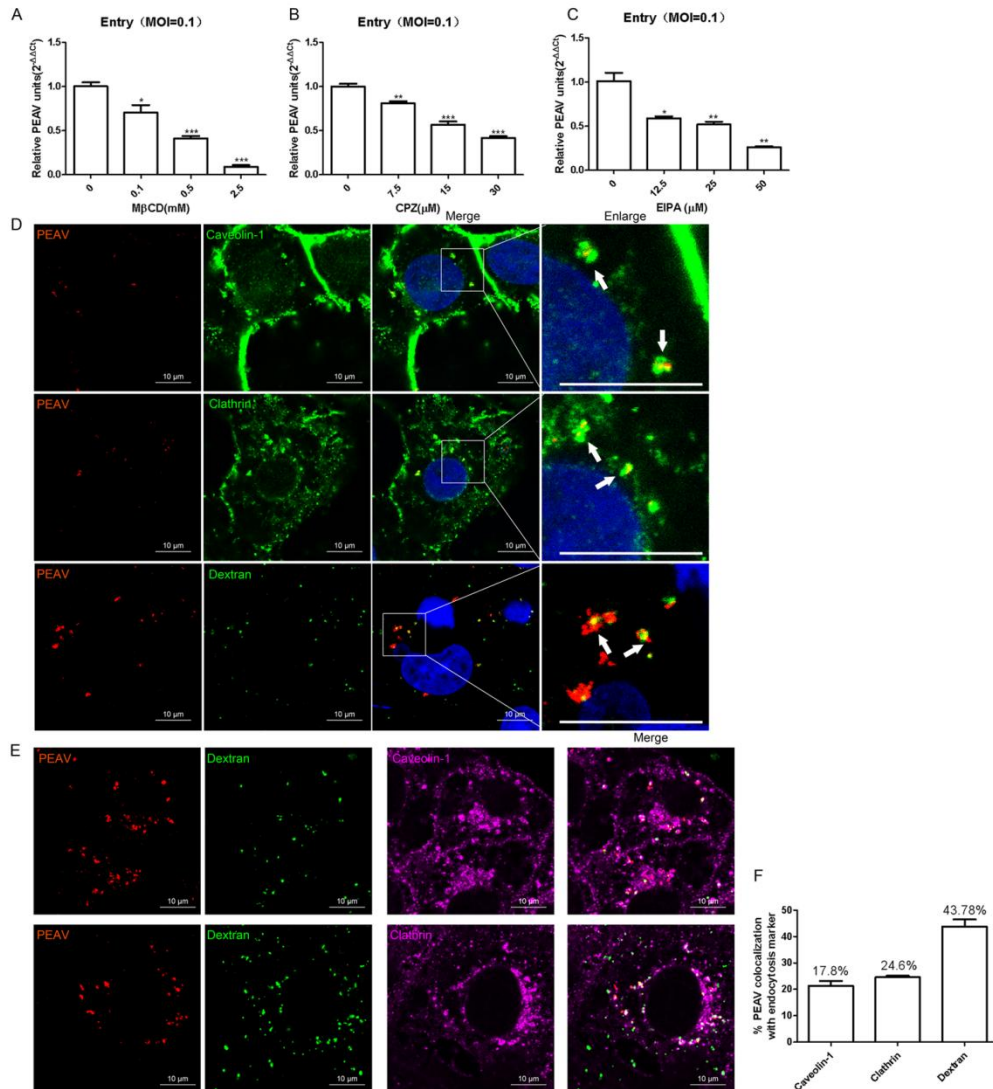

113

114 **FIG S1. PEAV enters into Vero cells via multiple pathways (caveolae-mediated**  
 115 **endocytosis, clathrin-mediated endocytosis, and macropinocytosis) at different MOI.**  
 116 (A to C) In order to measure the effect of low infection dose on virus entry. Vero cells  
 117 were pretreated with MβCD, CPZ, or EIPA (15 min, 37°C), followed by PEAV (MOI=0.1)  
 118 inoculation to allow entry (1 h, 37°C) in the presence of drugs. (D) Vero cells were  
 119 inoculated with PEAV (MOI=5) (1 h, 4°C), washed, incubated (15 min, 37°C), and fixed  
 120 (4% PFA, 15 min, RT). Vero cells were stained with anti-PEAV N, anti-clathrin, and  
 121 anti-caveolin-1 monoclonal antibodies, respectively, and their respective localizations  
 122 were observed with a confocal microscope. The white arrow shows that PEAV

123 co-localizes with endocytosis vesicles; scale bar=10  $\mu$ m. (E) Vero cells were inoculated  
124 with PEAV (MOI=10) (1 h, 4 ° C), washed, incubated in a maintenance medium  
125 containing 0.5 mg/ml Alexa Fluor 488-labeled dextran (15 min, 37 ° C), and fixed (4%  
126 PFA, 15 min, RT). Vero cells were stained with anti-PEAV N, anti-clathrin, and  
127 anti-caveolin-1 monoclonal antibodies, respectively, and their respective localizations  
128 were observed with a confocal microscope. The co-location ratio of dextran and PEAV  
129 was used as a reference to determine the main infection route. (F) As described above,  
130 co-localization proportions were determined using ImageJ software with Mander's  
131 co-localization coefficient. Over 250 co-localizing virus particles were included in the  
132 quantification. The mean value  $\pm$  SEM is representative of three individual enlarged  
133 pictures.

134

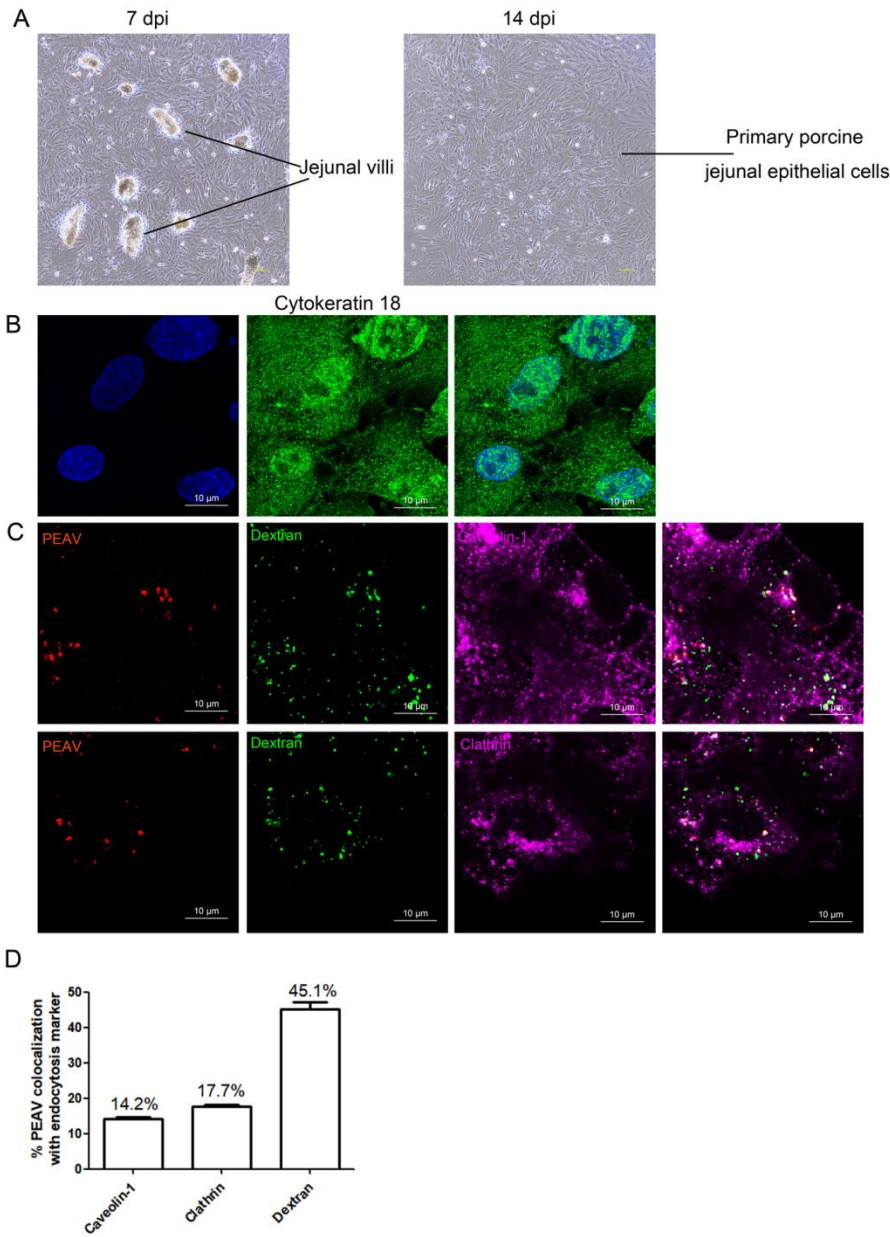

135

136 **FIG S2. PEAV enters primary porcine jejunal epithelial cells via multiple pathways**

137 **(caveolae-mediated endocytosis, clathrin-mediated endocytosis, and**

138 **macropinocytosis).** (A) The morphology of primary porcine jejunum villi cultured after 7

139 dpi and 14 dpi (10×magnification); scale bar=200 μm. (B) Epithelial cell surface marker

140 Cytokeratin 18 was used to determine cell purity. (C) Jejunal epithelial cells were

141 inoculated with PEAV (MOI=10) (1 h, 4°C), washed, incubated in a maintenance medium

142 containing 0.5 mg/ml Alexa Fluor 488-labeled dextran (15 min, 37°C), and fixed (4%



143 PFA, 15 min, RT). Vero cells were stained with anti-PEAV N, anti-clathrin, and  
144 anti-caveolin-1 monoclonal antibodies, respectively, and their respective localizations  
145 were observed with a confocal microscope. The co-location ratio of dextran and PEAV  
146 was used as a reference to determine the main infection route. (D) As described above,  
147 co-localization proportions were determined using ImageJ software with Mander's  
148 co-localization coefficient. Over 250 co-localizing virus particles were included in the  
149 quantification. The mean value  $\pm$  SEM is representative of three individual enlarged  
150 pictures.

151

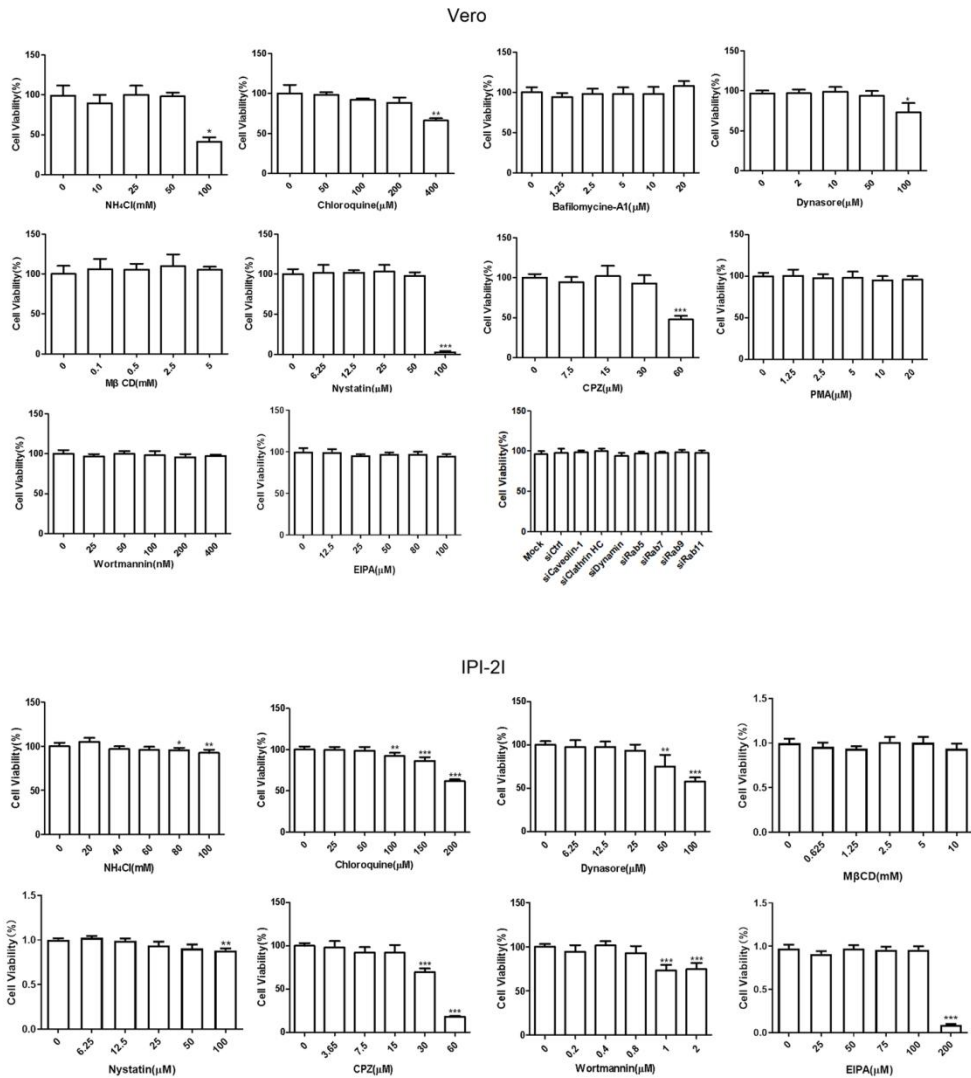

152

153 **FIG S3.** Vero or IPI-2I cell viabilities following incubation with each drug and siRNA  
 154 duplex tested in this work, as assessed using the CCK8 cell viability detection kit. All  
 155 results are presented as the mean  $\pm$  SD from three independent experiments (\*,  $P < 0.05$ ;  
 156 \*\*,  $P < 0.01$ ; \*\*\*,  $P < 0.001$ ).
